# Supplementary material for: The epigenetic signature of systemic insulin resistance in obese women
Source: PubMed Central journal article supplement (PMC5506095; doi:10.1007/s00125-016-4074-5), 2016-08-18
Supplement: 125_2016_4074_MOESM1_ESM.pdf [file 125_2016_4074_MOESM1_ESM.pdf]

## **Electronic Supplementary Methods**

### *Global Transcriptome assay*

WAT specimens (100 mg) were disrupted mechanically and RNA isolated using the RNeasy kit (cat no. 217004, Qiagen) according to the manufacturer's instructions. From high-quality total RNA we prepared and hybridized biotinylated complementary RNA to GeneChip Human Transcriptome Arrays 2.0 (HTA), and then washed, stained and scanned the arrays using standardized protocols (Affymetrix Inc., Santa Clara, CA, USA). There were no replicates in the microarray experiment. Group assignment was blinded during the above experiments. Subsequent data analyses were performed using the Omicsoft ArrayStudio v7.2 (<http://www.omicsoft.com/array-studio/>). The Robust Multi-array analysis algorithm was used for data normalization and calculation of gene expression. To allow comparisons of transcript levels between samples, all samples were subject to an all-probeset scaling-to-target signal of 100.

Among the 70,523 probesets on the HTA array we first filtered for the 23,442 probesets annotated with a gene symbol. Of the 23,442 probes, 5,860 (25%) transcripts with the lowest mean expression and 5,860 (25%) with the lowest variation in expression, i.e. standard deviation divided by mean expression, were excluded resulting in 11,722 probesets being taken forward for subsequent analysis of differentially expressed genes. The applied cutoff for mean expression will exclude a set of organ-specific genes that should not be expressed in adipose tissue according to the literature. When multiple probesets represented the same gene, we show results for the probeset with the highest call; this does not affect the results (significant  $p$  and fold change in expression). Webgestalt was used to identify pathways over-represented among differentially expressed genes and DMS [1].

### *DNA methylation microarray assays*

Genomic DNA was prepared from adipose tissue specimens and from PBMCs using the QiAamp DNA Mini kit as described (cat no. 51304, Qiagen, Hilden, Germany) [2]. The DNA purity and quality was confirmed by an A260/280 ratio >1.8 on a Nanodrop ND-1000 Spectrophotometer (Thermo Fisher Scientific Inc., Waltham, MA, US). The DNA concentration was measured by

Qubit (Life technologies, Stockholm, Sweden). One SAT and one VAT sample were excluded due to insufficient DNA quality.

DNA extracted from SAT and VAT pieces, as well as in PBMCs, was assayed using the Infinium Human Methylation 450 (450K) BeadChips as described (Illumina, San Diego, CA, USA) [2]. Genomic DNA (500 ng) was bisulfite treated using the EZ DNA methylation kit (Zymo Research, Orange, CA, USA) with the alternative incubation conditions recommended when using the Infinium Methylation Assay. The methylation assay was performed on 4  $\mu$ l bisulfite-converted genomic DNA (50 ng/ $\mu$ l) according to the Infinium HD Methylation Assay protocol (Part #15019519, Illumina). There were no replicates in the microarray experiment. Group assignment was blinded during the above experiments.

BeadChip images were analyzed as described captured using the Illumina iScan. The raw methylation score for each probe represented as a methylation beta-value was calculated using the GenomeStudio Methylation module software (2010.3) [3]. All included samples showed high quality bisulfite conversion according to Zymo-control samples and also passed all GenomeStudio quality control steps based on built in control probes for staining, hybridization, extension and specificity. We used the Bioconductor Lumi package to perform color and quantitative normalization of the DNA methylation data [4]. The BMIQ package was used to adjust the beta-values of type 2 design microarray probes into a statistical distribution characteristic of type 1 probes [5]. For differential methylation analysis, beta-values were converted to M-values [ $M = \log_2(\text{beta}/(1-\text{beta}))$ ], which have a more appropriate distribution for statistical tests of comparisons between groups. As beta-values are easier to interpret biologically, beta-values are retained when describing the results. Adjustment for array plate and bisulfite treatment batch was performed using ComBat [6].

The Infinium Human Methylation 450 BeadChip array contains 485,577 probes, which covers 21,231 RefSeq genes. Before analysis of differentially methylated sites (DMS) a number of filtering steps were performed. Probes containing common SNPs with minor allele frequency (MAF) >10% or with SNPs within 10 basepairs from the interrogated CpG sites according to Illumina file “humanmethylation450\_dbsnp137.snpupdate.table.v2.sorted” were excluded leaving 319,569 probes for subsequent analysis. Next, non-specific probes, i.e. hybridizing to  $\geq 2$  sites, were excluded leaving 302,822 probes for the next step [7]. In analysis of DMS we further

excluded probes not annotated to a gene according to Illumina leaving 236,147 probes. Finally, in each tissue separately we filtered to include only the probes that passed the threshold variance 0.1 in beta-value (Qlucore, [www.qlucore.com](http://www.qlucore.com)); thus, 112,057 (SAT), 124,089 (VAT) and 99,462 (PBMCs) probes, respectively, were taken forward to identify DMS.

### *Validation experiments*

Quantitative methylation analysis was performed using the EpiTYPER methodology [8] and the MassARRAY® system (Agena Biosciences, San Diego, CA, USA) according to manufacturer's recommendations and protocols. In the method a targeted amplification of bisulfite converted DNA is followed by in vitro transcription, RNase cleavage and subsequent fragment mass analysis by Matrix-Assisted Laser Desorption/Ionization Time of Flight Mass Spectrometry (MALDI-TOF MS) to quantify CpG sites.

PCR primers for amplicons encompassing the 450K cg:s of interest were designed using EpiDesigner (Agena Biosciences) and checked for bisulfite specificity by using BiSearch in silico PCR (<http://bisearch.enzim.hu/?m=genompsearch>). A 4-point dilution curve (0% methylated, 25% methylated, 50% methylated and 100% methylated) of EpiTect methylated and non-methylated bisulfite treated control DNA (Qiagen) was used to evaluate the quantitative recapture of methylation ratios of the amplicons. The 4-point dilution curve was run in triplicate and also provided data for standard deviation analysis. The amplicons used in this study all met the quality criteria of fully methylated and non-methylated data points measured at > 75% and < 20% methylation ratios, respectively, as well as standard deviation percentages < 10%. Samples were run in duplicate and standard deviation percentages >20% were removed from the study. The remaining data points correlated with  $R^2$  0.99. Bisulfite conversion efficiency in all samples was evaluated by analyzing 13 non-CpG C:s spread out in the amplicons analyzed in the study. All data was checked by manually and visually inspecting the mass spectra. Group assignment was blinded during the above experiments.

### **References**

- [1] Zhang B, Kirov S, Snoddy J (2005) WebGestalt: an integrated system for exploring gene sets in various biological contexts. *Nucleic Acids Res* 33: W741-748

- [2] Dahlman I, Sinha I, Gao H, et al. (2015) The fat cell epigenetic signature in post-obese women is characterized by global hypomethylation and differential DNA methylation of adipogenesis genes. *Int J Obes (Lond)*
- [3] Bibikova M, Lin Z, Zhou L, et al. (2006) High-throughput DNA methylation profiling using universal bead arrays. *Genome research* 16: 383-393
- [4] Du P, Kibbe WA, Lin SM (2008) lumi: a pipeline for processing Illumina microarray. *Bioinformatics* 24: 1547-1548
- [5] Teschendorff AE, Marabita F, Lechner M, et al. (2013) A beta-mixture quantile normalization method for correcting probe design bias in Illumina Infinium 450 k DNA methylation data. *Bioinformatics* 29: 189-196
- [6] Johnson WE, Li C, Rabinovic A (2007) Adjusting batch effects in microarray expression data using empirical Bayes methods. *Biostatistics* 8: 118-127
- [7] Chen YA, Lemire M, Choufani S, et al. (2013) Discovery of cross-reactive probes and polymorphic CpGs in the Illumina Infinium HumanMethylation450 microarray. *Epigenetics* 8: 203-209
- [8] Ehrich M, Nelson MR, Stanssens P, et al. (2005) Quantitative high-throughput analysis of DNA methylation patterns by base-specific cleavage and mass spectrometry. *Proc Natl Acad Sci U S A* 102: 15785-15790

**ESM Table 3. Differentially expressed Insulin Pathway genes in SAT between insulin resistant and sensitive women**

| <b>Gene</b>     |                                                                                         | <b>IS<br/>average</b> | <b>IR/I<br/>S</b> |
|-----------------|-----------------------------------------------------------------------------------------|-----------------------|-------------------|
| <i>ABCC1</i>    | ATP-binding cassette, sub-family C (CFTR/MRP), member 1                                 | 189                   | 1.13              |
| <i>ACTA1</i>    | actin, alpha 1, skeletal muscle                                                         | 197                   | 1.07              |
| <i>ADCY7</i>    | adenylate cyclase 7                                                                     | 178                   | 1.08              |
| <i>ADRB2</i>    | adrenoceptor beta 2, surface                                                            | 146                   | 0.89              |
| <i>AKT3</i>     | v-akt murine thymoma viral oncogene homolog 3 (protein kinase B, gamma)                 | 144                   | 0.92              |
| <i>ARHGAP26</i> | Rho GTPase activating protein 26                                                        | 111                   | 1.09              |
| <i>ARNT</i>     | aryl hydrocarbon receptor nuclear translocator                                          | 302                   | 0.94              |
| <i>BCL2L1</i>   | BCL2-like 1                                                                             | 151                   | 1.07              |
| <i>BMP6</i>     | bone morphogenetic protein 6                                                            | 307                   | 0.91              |
| <i>BMPR2</i>    | bone morphogenetic protein receptor, type II (serine/threonine kinase)                  | 513                   | 0.92              |
| <i>BNIP3</i>    | BCL2/adenovirus E1B 19kDa interacting protein 3                                         | 299                   | 0.92              |
| <i>BNIP3L</i>   | BCL2/adenovirus E1B 19kDa interacting protein 3-like                                    | 966                   | 0.93              |
| <i>BRAF</i>     | v-raf murine sarcoma viral oncogene homolog B1                                          | 235                   | 0.92              |
| <i>CCND2</i>    | cyclin D2                                                                               | 675                   | 1.21              |
| <i>CCNG1</i>    | cyclin G1                                                                               | 295                   | 0.88              |
| <i>CITED2</i>   | Cbp/p300-interacting transactivator, with Glu/Asp-rich carboxy-terminal domain, 2       | 333                   | 0.86              |
| <i>CSF1</i>     | colony stimulating factor 1 (macrophage)                                                | 219                   | 1.12              |
| <i>CSK</i>      | c-src tyrosine kinase                                                                   | 110                   | 1.06              |
| <i>CSRP2</i>    | cysteine and glycine-rich protein 2                                                     | 174                   | 0.82              |
| <i>CUL1</i>     | cullin 1                                                                                | 274                   | 0.95              |
| <i>CYTH1</i>    | cytohesin 1                                                                             | 141                   | 1.06              |
| <i>DDIT4</i>    | DNA-damage-inducible transcript 4                                                       | 234                   | 1.17              |
| <i>EIF4B</i>    | eukaryotic translation initiation factor 4B                                             | 815                   | 0.89              |
| <i>EPS15</i>    | epidermal growth factor receptor pathway substrate 15                                   | 498                   | 0.92              |
| <i>FBXO11</i>   | F-box protein 11                                                                        | 204                   | 0.91              |
| <i>FBXO32</i>   | F-box protein 32                                                                        | 107                   | 0.86              |
| <i>FRS2</i>     | fibroblast growth factor receptor substrate 2                                           | 155                   | 0.93              |
| <i>GAB1</i>     | GRB2-associated binding protein 1                                                       | 141                   | 0.89              |
| <i>GNAI1</i>    | guanine nucleotide binding protein (G protein), alpha inhibiting activity polypeptide 1 | 310                   | 0.85              |
| <i>HBP1</i>     | HMG-box transcription factor 1                                                          | 235                   | 0.91              |
| <i>HK1</i>      | hexokinase 1                                                                            | 170                   | 1.09              |
| <i>IL6R</i>     | interleukin 6 receptor                                                                  | 133                   | 1.07              |
| <i>IRF8</i>     | interferon regulatory factor 8                                                          | 205                   | 1.29              |
| <i>IRS2</i>     | insulin receptor substrate 2                                                            | 242                   | 0.85              |

|                 |                                                                                                     |     |      |
|-----------------|-----------------------------------------------------------------------------------------------------|-----|------|
| <i>ITGA1</i>    | integrin, alpha 1                                                                                   | 461 | 0.87 |
| <i>JMY</i>      | junction mediating and regulatory protein, p53 cofactor                                             | 128 | 0.94 |
| <i>KDR</i>      | kinase insert domain receptor (a type III receptor tyrosine kinase)                                 | 313 | 0.85 |
| <i>KLF8</i>     | Kruppel-like factor 8                                                                               | 219 | 0.90 |
| <i>MAP3K5</i>   | mitogen-activated protein kinase kinase kinase 5                                                    | 132 | 0.83 |
| <i>MAPK8</i>    | mitogen-activated protein kinase 8                                                                  | 73  | 0.94 |
| <i>NBN</i>      | nibrin                                                                                              | 174 | 0.93 |
| <i>NDRG1</i>    | N-myc downstream regulated 1                                                                        | 506 | 0.92 |
| <i>NEDD4L</i>   | neural precursor cell expressed, developmentally down-regulated 4-like, E3 ubiquitin protein ligase | 185 | 0.80 |
| <i>NR3C1</i>    | nuclear receptor subfamily 3, group C, member 1 (glucocorticoid receptor)                           | 248 | 0.91 |
| <i>NRIP1</i>    | nuclear receptor interacting protein 1                                                              | 518 | 0.91 |
| <i>PAG1</i>     | phosphoprotein associated with glycosphingolipid microdomains 1                                     | 70  | 1.10 |
| <i>PAWR</i>     | PRKC, apoptosis, WT1, regulator                                                                     | 122 | 0.87 |
| <i>PDE3B</i>    | phosphodiesterase 3B, cGMP-inhibited                                                                | 673 | 0.86 |
| <i>PFKFB3</i>   | 6-phosphofructo-2-kinase/fructose-2,6-biphosphatase 3                                               | 542 | 0.80 |
| <i>PKM</i>      | pyruvate kinase, muscle                                                                             | 320 | 1.18 |
| <i>PPM1A</i>    | protein phosphatase, Mg <sup>2+</sup> /Mn <sup>2+</sup> dependent, 1A                               | 156 | 0.94 |
| <i>PTPRJ</i>    | protein tyrosine phosphatase, receptor type, J                                                      | 139 | 1.18 |
| <i>RANBP9</i>   | RAN binding protein 9                                                                               | 321 | 0.89 |
| <i>RB1CC1</i>   | RB1-inducible coiled-coil 1                                                                         | 165 | 0.89 |
| <i>RBL2</i>     | retinoblastoma-like 2 (p130)                                                                        | 307 | 0.92 |
| <i>RICTOR</i>   | RPTOR independent companion of MTOR, complex 2                                                      | 148 | 0.92 |
| <i>SERPINE1</i> | serpin peptidase inhibitor, clade E (nexin, plasminogen activator inhibitor type 1), member 1       | 69  | 1.17 |
| <i>SIN3A</i>    | SIN3 transcription regulator homolog A (yeast)                                                      | 251 | 0.94 |
| <i>SIRT1</i>    | sirtuin 1                                                                                           | 175 | 0.91 |
| <i>SLC3A2</i>   | solute carrier family 3 (activators of dibasic and neutral amino acid transport), member 2          | 198 | 1.07 |
| <i>SMAD5</i>    | SMAD family member 5                                                                                | 186 | 0.93 |
| <i>SMAD9</i>    | SMAD family member 9                                                                                | 104 | 0.94 |
| <i>SMARCC2</i>  | SWI/SNF related, matrix associated, actin dependent regulator of chromatin, subfamily c, member 2   | 488 | 0.93 |
| <i>TBLIXR1</i>  | transducin (beta)-like 1 X-linked receptor 1                                                        | 379 | 0.94 |
| <i>TJPI</i>     | tight junction protein 1                                                                            | 453 | 0.89 |
| <i>UBE3A</i>    | ubiquitin protein ligase E3A                                                                        | 208 | 0.93 |
| <i>USP8</i>     | ubiquitin specific peptidase 8                                                                      | 211 | 0.92 |
| <i>WASL</i>     | Wiskott-Aldrich syndrome-like                                                                       | 266 | 0.94 |
| <i>YES1</i>     | v-yes-1 Yamaguchi sarcoma viral oncogene homolog 1                                                  | 189 | 0.91 |
| <i>YWHAH</i>    | tyrosine 3-monooxygenase/tryptophan 5-monooxygenase activation protein, eta polypeptide             | 205 | 1.06 |

**ESM Table 6. Direct correlations between CpG methylation and gene expression**

**SAT<sup>a</sup>**

| <b>Gene</b>      | <b>Probe</b> | <b>Gene region</b> | <b>Expression<br/>IR-IS (Log2)</b> | <b>Methylation<br/>IR-IS (beta)</b> | <b>Correlation<sup>c</sup></b> |
|------------------|--------------|--------------------|------------------------------------|-------------------------------------|--------------------------------|
| <i>ABCC3</i>     | cg19734752   | Body               | 1.259                              | 0.024                               | 0.192                          |
| <i>ADAMTS15</i>  | cg19333883   | Body               | 1.203                              | 0.032                               | 0.178                          |
| <i>ADAMTS2</i>   | cg21183664   | Body               | 1.112                              | 0.031                               | 0.275                          |
| <i>ALDH1A1</i>   | cg01812894   | TSS1500            | -1.466                             | 0.030                               | -0.219                         |
| <i>AMPD3</i>     | cg19132462   | TSS200             | 1.142                              | -0.039                              | -0.101                         |
| <i>ATP10A</i>    | cg03924551   | Body               | 1.119                              | 0.030                               | 0.313                          |
| <i>C1QTNF7</i>   | cg24829483   | 5'UTR              | -1.161                             | 0.040                               | -0.168                         |
| <i>C1QTNF7</i>   | cg00545229   | TSS200             | -1.161                             | 0.049                               | -0.137                         |
| <i>C1QTNF7</i>   | cg03290977   | Body               | -1.161                             | -0.034                              | 0.167                          |
| <i>CHST3</i>     | cg10772263   | 5'UTR              | 1.139                              | 0.049                               | -0.143                         |
| <i>COL5A1</i>    | cg14274542   | Body               | 1.101                              | 0.039                               | 0.175                          |
| <i>COL5A1</i>    | cg24354213   | Body               | 1.101                              | 0.024                               | 0.230                          |
| <i>CPED1</i>     | cg03464229   | Body               | -1.162                             | -0.038                              | 0.247                          |
| <i>CYP4X1</i>    | cg27291464   | TSS1500            | -1.236                             | 0.038                               | -0.290                         |
| <i>EDNRA</i>     | cg17073859   | TSS1500            | -1.338                             | 0.037                               | -0.197                         |
| <i>EDNRA</i>     | cg00974629   | TSS200             | -1.338                             | 0.050                               | -0.297                         |
| <i>GPC1</i>      | cg02653521   | TSS1500            | 1.107                              | -0.062                              | -0.226                         |
| <i>IRF8</i>      | cg10334323   | Body               | 1.254                              | 0.042                               | 0.302                          |
| <i>KCNAB1</i>    | cg01800345   | Body               | -1.138                             | 0.025                               | 0.117                          |
| <i>NECAB1</i>    | cg23133255   | TSS1500            | -1.460                             | 0.028                               | -0.195                         |
| <i>NIPSNAP3B</i> | cg13888748   | TSS1500            | -1.334                             | 0.052                               | -0.294                         |
| <i>PCMTD1</i>    | cg00836007   | 5'UTR              | -1.114                             | 0.044                               | -0.192                         |
| <i>PTGER3</i>    | cg17888090   | Body               | -1.146                             | -0.026                              | 0.199                          |
| <i>PTGER3</i>    | cg16823292   | Body               | -1.146                             | -0.054                              | 0.190                          |
| <i>RHOT1</i>     | cg06674117   | Body               | -1.124                             | -0.055                              | 0.167                          |
| <i>RNF217</i>    | cg18196453   | Body               | -1.103                             | -0.058                              | 0.253                          |
| <i>ROR1</i>      | cg03225664   | Body               | 1.120                              | -0.024                              | 0.138                          |

|                        |            |         |        |        |        |
|------------------------|------------|---------|--------|--------|--------|
| <i>ROR1</i>            | cg24052817 | Body    | 1.120  | -0.029 | 0.106  |
| <i>SAMD4A</i>          | cg23901920 | Body    | 1.102  | 0.041  | 0.201  |
| <i>SAMD4A</i>          | cg26437697 | Body    | 1.102  | 0.040  | 0.124  |
| <i>SEMA3G</i>          | cg07357683 | TSS1500 | 1.189  | -0.020 | -0.211 |
| <i>SH3PXD2B</i>        | cg05223396 | Body    | 1.108  | 0.034  | 0.134  |
| <i>SLC4A4</i>          | cg07991704 | 5'UTR   | -1.295 | 0.045  | -0.169 |
| <i>SYNE2</i>           | cg16725974 | 5'UTR   | -1.129 | 0.047  | -0.228 |
| <i>TSPYL2</i>          | cg22170936 | TSS200  | -1.149 | 0.040  | -0.242 |
| <i>VTRNA1-3</i>        | cg23910413 | TSS1500 | 1.152  | -0.049 | -0.125 |
| <b>VAT<sup>b</sup></b> |            |         |        |        |        |
| <i>CA3</i>             | cg12264626 | TSS1500 | -1.945 | 0.029  | -0.313 |
| <i>CA3</i>             | cg13721134 | TSS1500 | -1.945 | 0.028  | -0.323 |
| <i>CDKN2C</i>          | cg00908631 | TSS1500 | -1.229 | 0.048  | -0.104 |
| <i>DAPK2</i>           | cg23165541 | 5'UTR   | -1.199 | 0.055  | -0.225 |
| <i>PAIP2B</i>          | cg06241044 | 5'UTR   | -1.155 | 0.030  | -0.175 |

- a. We calculated correlation between expression of 647 differentially expressed genes and 10,746 DMS in SAT between IR and IS women.
- b. We calculated correlation between expression of 51 differentially expressed genes and 10,217 DMS in VAT between IR and IS women.
- c. Shown are Spearman correlation coefficient <-0.1 (CpG-sites in TSS1500, TSS200 or 5'UTR) or >0.1 (CpG-sites in gene body or 3'UTR).



### per-gene correlations between VAT and SAT

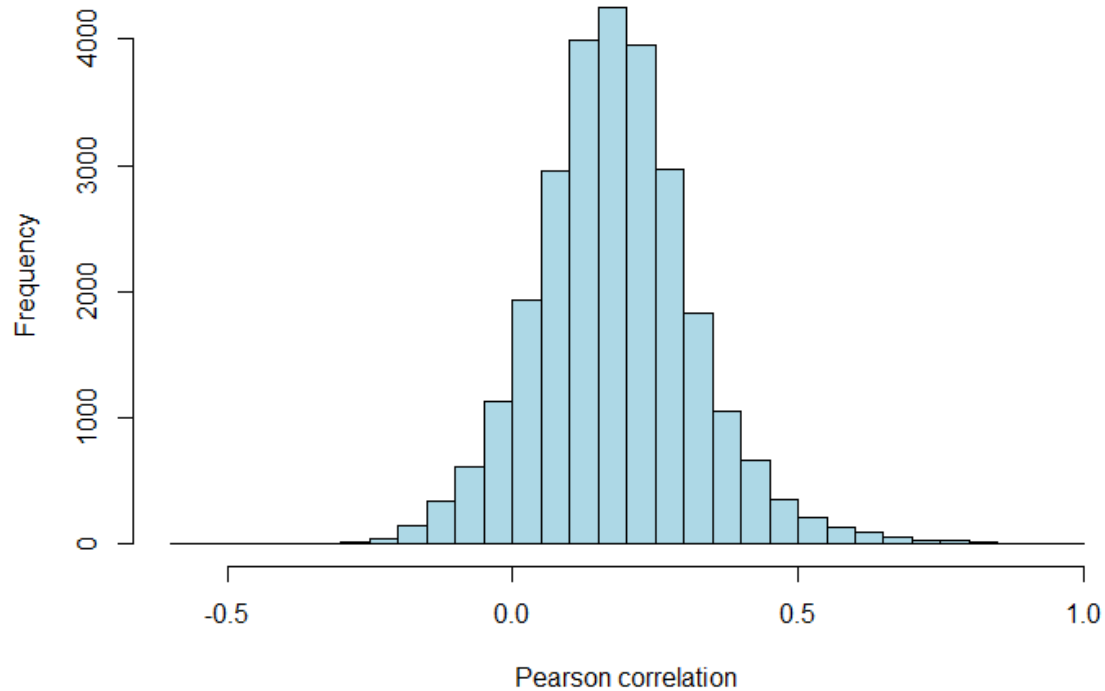

**ESM Fig. 1A. Histogram of per-gene correlation between VAT and SAT tissue samples,** respectively.  $\log_2$  normalized mRNA expression levels were used to compute the Pearson correlation coefficient for each gene by matching corresponding VAT and SAT tissue samples from each participant.

## between-sample correlations between VAT and SAT

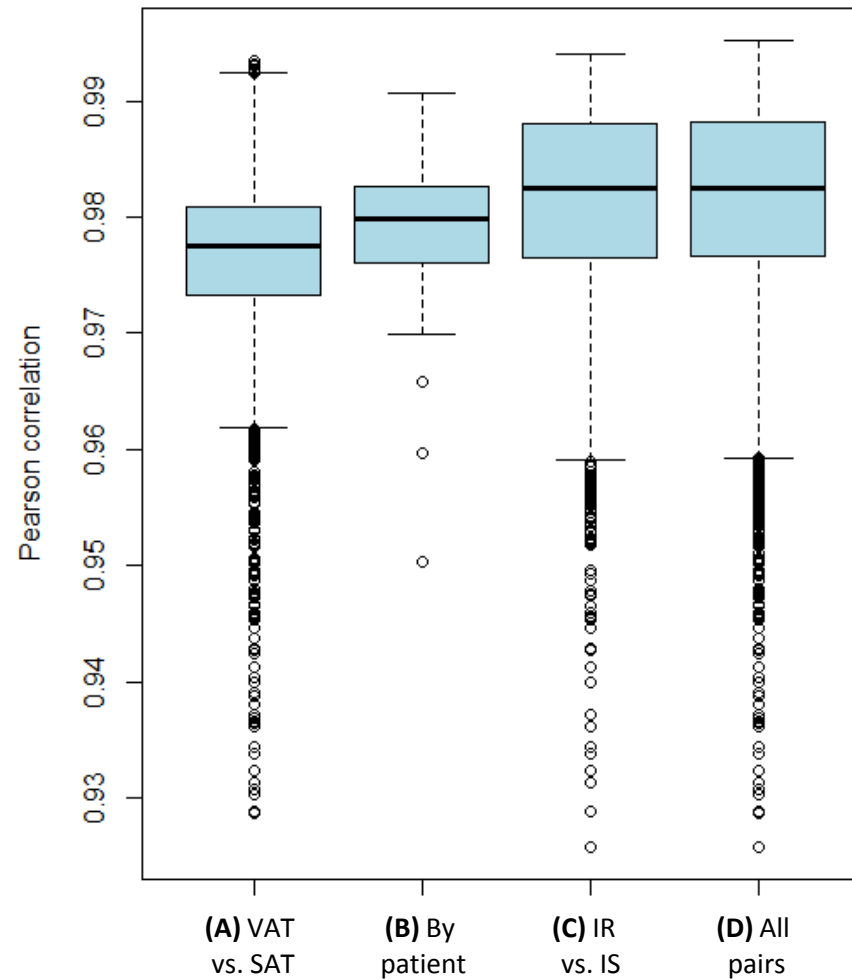

**ESM Fig. 1B. Boxplots of between-sample Pearson correlation coefficients.** Coefficients were computed using  $\log_2$  normalized mRNA expression levels for all genes represented on the array. **A)** The first box shows the correlation between VAT and SAT samples. **B)** Same as A) but showing only the sample pairs from the same participant. As expected, within-participant correlation is higher than between-participant. For comparison, we show **C)** correlation between IR and IS samples, and **D)** all pairwise correlation coefficients. As expected, within-tissue type correlation coefficients are on average higher than between-tissue type comparisons.
